# Supplementary material
Source: publisher site journal article supplement (https://www.dovepress.com/get_supplementary_file.php?f=400522.docx)
Supplement: Supplementary file 1 [file get_supplementary_file.php]

# Table S1 Patients without established cardiovascular disease: baseline cohort characteristics

| Variable | Mean | Unit | Source |
| --- | --- | --- | --- |
| **PATIENT DEMOGRAPHICS** |  |  |  |
| Start age | 55.70 | Years | Haring et al 20141 |
| Duration of Diabetes | 6.00 | Years | Haring et al 20141 |
| Prop. Male | 0.57 | [0-1] | Haring et al 20141 |
|  |  |  |  |
| **BASELINE RISK FACTORS** |  |  |  |
| HbA1c | 7.90 | %-points | Haring et al 20141 |
| SBP | 129.40 | mmHg | Haring et al 20141 |
| DBP | 78.70 | mmHg | Haring et al 20141 |
| T-CHOL | 161.64 | mg/dl | CSR2 |
| HDL | 43.95 | mg/dl | CSR2 |
| LDL | 71.79 | mg/dl | CSR2 |
| TRIG | 103.19 | mg/dl | CSR2 |
| BMI | 29.20 | kg/m2 | Haring et al 20141 |
| eGFR | 89.00 | ml/min/1.73m2 | Haring et al 20141 |
| Haemoglobin | 14.50 | gr/dl | Hayes et al 20133 |
| WBC | 6.80 | 106/ml | Hayes et al 20133 |
| Heart rate | 72.00 | bpm | Hayes et al 20133 |
| WHR | 0.93 |  | Folsom et al 20034 |
| uAER | 3.10 | mg/mmol | Davis et al 20105 |
| Serum Creatinine | 0.88 | mg/dl | CSR2 |
| Serum albumin | 4.75 | g/dl | CSR2 |
| Prop. smoker | 0.147 | [0-1] | CSR2 |
| Cigarettes/day | 3.00 |  | WHO. The Tobacco Atlas6 |
| Alcohol consumption oz/week | 3.00 | Oz/week | WHO. Global Status Report on Alcohol7 |
|  |  |  |  |
| **RACIAL CHARACTERISTICS** |  |  |  |
| Prop. White | 0.531 | [0-1] | Haring et al 20141 |
| Prop. Black | 0.009 | [0-1] | Haring et al 20141 |
| Prop. Hispanic | 0.000 | [0-1] | Haring et al 20141 |
| Prop. Native American | 0.006 | [0-1] | Haring et al 20141 |
| Prop. Asian/Pacific Islander | 0.454 | [0-1] | Haring et al 20141 |
|  |  |  |  |
| **BASELINE CVD COMPLICATIONS** |  |  |  |
| Prop. MI | 0.000 | [0-1] | Patients without established CVD |
| Prop. Angina | 0.000 | [0-1] | Patients without established CVD |
| Prop. PVD | 0.000 | [0-1] | Patients without established CVD |
| Prop. stroke | 0.000 | [0-1] | Patients without established CVD |
| Prop. HF | 0.000 | [0-1] | Patients without established CVD |
| Prop. Atrial fibrillation | 0.000 | [0-1] | Patients without established CVD |
| Prop. LVH | 0.000 | [0-1] | Patients without established CVD |
|  |  |  |  |
| **BASELINE RENAL COMPLICATIONS** | | | |
| Prop. MA | 0.027 | [0-1] | CSR2 |
| Prop. GRP | 0.006 | [0-1] | CSR2 |
| Prop. ESRD | 0.000 | [0-1] | Patients without established CVD |
|  |  |  |  |
| **BASELINE RETINOPATHY COMPLICATIONS** | | | |
| Prop. BDR | 0.047 | [0-1] | CSR2 |
| Prop. PDR | 0.071 | [0-1] | The ADVANCE Collaborative Group8 |
| Prop. SVL | 0.030 | [0-1] | Ismail-Beigi et al 20109 |
|  |  |  |  |
| **BASELINE MACULAR EDEMA** |  |  |  |
| Prop. ME | 0.001 | [0-1] | CSR2 |
|  |  |  |  |
| **BASELINE CATARACT** |  |  |  |
| Prop. Cataract | 0.058 | [0-1] | CSR2 |
|  |  |  |  |
| **BASELINE FOOT ULCER COMPLICATIONS** | | | |
| Prop. Uninfected ulcer | 0.009 | [0-1] | CSR2 |
| Prop. Infected ulcer | 0.000 | [0-1] |  |
| Prop. Healed ulcer | 0.000 | [0-1] |  |
| Prop. History of amputation | 0.000 | [0-1] |  |
| **BASELINE FOOT ULCER COMPLICATIONS** | | | |
| Prop. Neuropathy | 0.082 | [0-1] | CSR2 |
| **BASELINE DEPRESSION** |  |  |  |
| Prop. Depression | 0.031 | [0-1] | CSR2 |

**Abbreviations**: HbA1c: glycosylated hemoglobin; SBP: systolic blood pressure; DBP: diastolic blood pressure; T-Chol: total cholesterol; HDL: high density lipoprotein; LDL: low density lipoprotein; TRIG: triglycerides; BMI: body mass index; eGFR: estimated glomerular filtration rate; WBC: white blood cells; WHR: waist-to-hip ratio; uAER: urinary albumin/creatinine ratio; CVD: cardiovascular disease; MI: myocardial infarction; PVD: peripheral vascular disease; HF: heart failure; LVH: left ventricular hypertrophy; MA: microalbuminuria; GRP: gross renal proteinuria; ESRD: end-stage renal disease; BDR: background diabetic retinopathy; PDR: proliferative diabetic retinopathy; SVL: severe vision loss; ME: macular edema.

# Table S2 Assumptions applied to match endpoint definitions in ITC and IQVIA CDM

| ITC endpoint | CDM endpoint | Comment |
| --- | --- | --- |
| Cardiovascular (CV) related mortality | Event fatality | The UKPDS 82 mortality equations were designed to track death with or without history of events in that year. Thus, does not differentiate between CV and non-CV death. As a proxy, we compared CV mortality endpoint from the ITC to event fatality, ie mortality in the year of one of the following events: MI, stroke, heart failure, angina, end-stage renal disease or amputation. |
| All-cause mortality (ACM) | Mortality from all causes | Mortality from all causes was assessed in the CDM as the sum of event fatality and non-event related fatality. Since event fatality risk was already adjusted by the RR from the above category, the RR for the non-event related fatality risk (ie fatality related to the history of complications in subsequent years or non-diabetes specific fatality) was calibrated such that the ACM outcome from the CDM matched the expected ACM outcome for the respective comparator following ITC adjustments. |
| Composite endpoint | */* | The composite endpoint is not evaluated in the CDM |
| Hospitalization due to heart failure | Heart failure | Hospitalization due to heart failure as reported in the CVOT is assumed to be equal to heart failure as defined in the CDM. |
| Non-fatal (NF) stroke | Fatal and non-fatal (F&NF) stroke | Since the CDM predicts the incidence of fatal & non-fatal stroke, the RR for NF stroke from the ITC was adjusted to derive the corresponding RR for F&NF stroke according to the proportions of NF stroke and fatal (F) stroke in the empagliflozin arm of the EMPA-REG OUTCOME study. This adjustment was based on the assumption that the RR for F stroke was risk neutral (ie RR = 1). As CV mortality is already considered in the first endpoint of this list, this assumption was applied to avoid double counting. |
| Non-fatal (NF) myocardial infarction (MI) | Fatal and non-fatal myocardial infarction | The same approach as presented in the above example for stroke was applied to MI |

# Table S3 Patients with established cardiovascular disease: baseline cohort characteristics

| Variable | Mean | Unit | Source |
| --- | --- | --- | --- |
| **PATIENT DEMOGRAPHICS** |  |  |  |
| Start age | 63.10 | Years | Zinman et al 201510 |
| Duration of Diabetes | 9 | Years | Zinman et al 201510 |
| Prop. Male | 0.71 | [0-1] | Zinman et al 201510 |
|  |  |  |  |
| **BASELINE RISK FACTORS** |  |  |  |
| HbA1c | 8.07 | %-points | Zinman et al 201510 |
| SBP | 135.47 | mmHg | Zinman et al 201510 |
| DBP | 76.67 | mmHg | Zinman et al 201510 |
| T-CHOL | 162.90 | mg/dl | Zinman et al 201510 |
| HDL | 44.40 | mg/dl | Zinman et al 201510 |
| LDL | 85.60 | mg/dl | Zinman et al 201510 |
| TRIG | 170.50 | mg/dl | Zinman et al 201510 |
| BMI | 30.62 | kg/m2 | Zinman et al 201510 |
| eGFR | 74.04 | ml/min/1.73m2 | Zinman et al 201510 |
| Hemoglobin | 14.50 | gr/dl | Hayes et al 20133 |
| WBC | 6.80 | 106/ml | Hayes et al 20133 |
| Heart rate | 68.08 | Bpm | Hayes et al 20133 |
| WHR | 0.93 |  | Folsom et al 20034 |
| uAER | 19.3 | mg/mmol | Zinman et al 201510 |
| Serum Creatinine | 1.1 | mg/dl | Folsom et al 20034 |
| Serum albumin | 3.9 | g/dl | Folsom et al 20034 |
| Prop. smoker | 0.132 | [0-1] | Zinman et al 201510 |
| Cigarettes/day | 3.00 |  | WHO. The Tobacco Atlas6 |
| Alcohol consumption oz/week | 3.00 | Oz/week | WHO. Global Status Report on Alcohol7 |
|  |  |  |  |
| **RACIAL CHARACTERISTICS** |  |  |  |
| Prop. White | 0.543 | [0-1] | Zinman et al 201510 |
| Prop. Black | 0.051 | [0-1] | Zinman et al 201510 |
| Prop. Hispanic | 0.180 | [0-1] | Zinman et al 201510 |
| Prop. Native American | 0.008 | [0-1] | Zinman et al 201510 |
| Prop. Asian/Pacific Islander | 0.218 | [0-1] | Zinman et al 201510 |
|  |  |  |  |
| **BASELINE CVD COMPLICATIONS** |  |  |  |
| Prop. MI | 0.466 | [0-1] | Zinman et al 201510 |
| Prop. Angina | 0.290 | [0-1] | Zinman et al 201510 |
| Prop. PVD | 0.208 | [0-1] | Zinman et al 201510 |
| Prop. stroke | 0.233 | [0-1] | Zinman et al 201510 |
| Prop. HF | 0.101 | [0-1] | Zinman et al 201510 |
| Prop. Atrial fibrillation | 0.000 | [0-1] | No source |
| Prop. LVH | 0.000 | [0-1] | No source |
|  |  |  |  |
| **BASELINE RENAL COMPLICATIONS** | | | |
| Prop. MA | 0.195 | [0-1] | Zinman et al 201510 |
| Prop. GRP | 0.000 | [0-1] | No source |
| Prop. ESRD | 0.000 | [0-1] | No source |
|  |  |  |  |
| **BASELINE RETINOPATHY COMPLICATIONS** | | | |
| Prop. BDR | 0.110 | [0-1] | Zinman et al 201510 |
| Prop. PDR | 0.110 | [0-1] | Zinman et al 201510 |
| Prop. SVL | 0.000 | [0-1] | No source |
|  |  |  |  |
| **BASELINE MACULAR EDEMA** |  |  |  |
| Prop. ME | 0.000 | [0-1] | No source |
|  |  |  |  |
| **BASELINE CATARACT** |  |  |  |
| Prop. Cataract | 0.000 | [0-1] | No source |
|  |  |  |  |
| **BASELINE FOOT ULCER COMPLICATIONS** | | | |
| Prop. Uninfected ulcer | 0.006 | [0-1] | Zinman et al 201510 |
| Prop. Infected ulcer | 0.000 | [0-1] | No source |
| Prop. Healed ulcer | 0.000 | [0-1] | No source |
| Prop. History of amputation | 0.000 | [0-1] | No source |
| **BASELINE FOOT ULCER COMPLICATIONS** | | | |
| Prop. Neuropathy | 0.313 | [0-1] | Zinman et al 201510 |
| **BASELINE DEPRESSION** |  |  |  |
| Prop. Depression | 0.000 | [0-1] | No source |

**Abbreviations**: HbA1c: glycosylated hemoglobin; SBP: systolic blood pressure; DBP: diastolic blood pressure; T-Chol: total cholesterol; HDL: high density lipoprotein; LDL: low density lipoprotein; TRIG: triglycerides; BMI: body mass index; eGFR: estimated glomerular filtration rate; WBC: white blood cells; WHR: waist-to-hip ratio; uAER: urinary albumin/creatinine ratio; CVD: cardiovascular disease; MI: myocardial infarction; PVD: peripheral vascular disease; HF: heart failure; LVH: left ventricular hypertrophy; MA: microalbuminuria; GRP: Gross renal proteinuria; ESRD: end-stage renal disease; BDR: background diabetic retinopathy; PDR: proliferative diabetic retinopathy; SVL: severe vision loss; ME: macular edema.

# Table S4 Health state utilities used in all analyses

| Complication | Utility | Reference |
| --- | --- | --- |
| U T2 no complications | 0.785 | Beaudet et al 201411 |
| DisU MI event | -0.055 | Beaudet et al 201411 |
| U post MI | 0.730 | Calculated |
| DisU angina event | -0.090 | Beaudet et al 201411 |
| U angina | 0.695 | Calculated |
| DisU heart failure event | -0.108 | Beaudet et al 201411 |
| U heart failure | 0.677 | Calculated |
| DisU stroke event | -0.164 | Beaudet et al 201411 |
| U post Stroke | 0.621 | Calculated |
| DisU PVD | -0.061 | Beaudet et al 201411 |
| U PVD | 0.724 | Calculated |
| DisU MA | 0 | Assumed null |
| U MA | 0.785 | Calculated |
| DisU GRP | -0.048 | Beaudet et al 201411 |
| U GRP | 0.737 | Calculated |
| DisU HD | -0.164 | Beaudet et al 201411 |
| U HD | 0.621 | Calculated |
| DisU PD | -0.204 | Beaudet et al 201411 |
| U PD | 0.581 | Calculated |
| U RT | 0.762 | Beaudet et al 201411 |
| DisU BDR | -0.040 | Beaudet et al 201411 |
| U BDR | 0.745 | Calculated |
| U BDR wrongly treated | 0.745 | Calculated |
| DisU PDR | -0.070 | Beaudet et al 201411 |
| U PDR laser treated | 0.715 | Calculated |
| U PDR no Laser | 0.715 | Calculated |
| DisU ME | -0.040 | Beaudet et al 201411 |
| U ME | 0.745 | Calculated |
| DisU SVL | -0.074 | Beaudet et al 201411 |
| U SVL | 0.711 | Calculated |
| DisU cataract | -0.016 | Beaudet et al 201411 |
| U cataract | 0.769 | Calculated |
| DisU neuropathy | -0.084 | Beaudet et al 201411 |
| U neuropathy | 0.701 | Calculated |
| DisU healed ulcer | 0 | Assumed null |
| U healed ulcer | 0.785 | calculated |
| DisU active ulcer | -0.170 | Beaudet et al 201411 |
| U active ulcer | 0.615 | Calculated |
| DisU amputation event | -0.280 | Beaudet et al 201411 |
| U post amputation | 0.505 | Calculated |
| Diminishing NSHE disutility | Yes | Lauridsen et al 201412 |
| DisU for SHE 1 (during daytime) | -0.0137 | Foos et al 201813 |
| DisU for SHE 1 (nocturnal) | -0.0137 | Foos et al 201813 |
| DisU for SHE 2 (during daytime) | -0.0578 | Foos et al 201813 |
| DisU for SHE 2 (nocturnal) | -0.0578 | Foos et al 201813 |

**Abbreviations**: Amp: amputation; BDR: background retinopathy; CHF: congestive heart failure; DisU: disutility of an event; GRP: gross renal proteinuria; GUI: genital and urinary infection; HD: hemodialysis; HF: heart failure; MA: microalbuminuria; ME: macular edema; MI: myocardial infarction; NSHE: non-severe hypoglycemia event; PD: peritoneal dialysis; PDR: proliferative diabetic retinopathy; PVD: peripheral vascular disease; RT: renal transplant; SHE1: severe hypoglycemia event (not requiring medical assistance); SHE2: severe hypoglycemia event (requiring medical assistance); SVL: severe vision loss; U: health state utility.

# Table S5 Annual treatment cost applied in the analysis

| Intervention - posology | Annual Cost (€) |
| --- | --- |
| Empagliflozin - 10mg/day | 530.71 |
| Sitagliptin - 100mg/day | 354.05 |
| Metformin - 1,700mg/day | 27.38 |
| Insulin glargine - 42 UI/day (including administration costs) † | 736.98 |
| Insulin glargine - 32.3 UI/day (including administration costs) ‡ | 624.11 |
| Basal-bolus therapy - 94 UI/day + 59 UI/day (including administration costs) § | 2,062.10 |
| *Administration costs* |  |
| Needles - 1/day | 33.51 |
| SMBG testing - 10/week | 214.75 |

† For patients without established cardiovascular disease, as second line therapy. ‡ For patients with established cardiovascular disease, as concomitant first line therapy. § The price of insulin glargine was used as a proxy for both basal and bolus insulin. **Abbreviations**: SMBG: self-monitoring blood glucose.

# Table S6 Costs associated with diabetes-related complications

| Variable | Annual cost (€) | Source |
| --- | --- | --- |
| **Management Costs** |  |  |
| Annual statins treatment | 145.77 | Tzanetakos et al 201414 (costs are inflation-adjusted to 2021 values)15 |
| Annual Aspirin | 14.20 | Tzanetakos et al 201414 (costs are inflation-adjusted to 2021 values)15 |
| Annual ACE inhibitor | 77.15 | Tzanetakos et al 201414 (costs are inflation-adjusted to 2021 values)15 |
| Annual screening microalbuminuria | 8.53 | Tzanetakos et al 201414 (costs are inflation-adjusted to 2021 values)15 |
| Annual screening gross renal proteinuria | 8.53 | Tzanetakos et al 201414 (costs are inflation-adjusted to 2021 values)15 |
| Stopping ACE inhibitor due to side effects | 14.78 | Tzanetakos et al 201414 (costs are inflation-adjusted to 2021 values)15 |
| Annual eye screening | 9.85 | Tzanetakos et al 201414 (costs are inflation-adjusted to 2021 values)15 |
| Annual foot screening program | 9.85 | Tzanetakos et al 201414 (costs are inflation-adjusted to 2021 values)15 |
| Annual non-standard ulcer treatment | 0 | Tzanetakos et al 201414 (costs are inflation-adjusted to 2021 values)15 |
|  |  |  |
| **Direct Costs CVD Complications** |  |  |
| Myocardial infarction 1st year | 5,910.65 | Tzanetakos et al 201414 (costs are inflation-adjusted to 2021 values)15 |
| Myocardial infarction 2nd+ years | 1,934.75 | Tzanetakos et al 201414 (costs are inflation-adjusted to 2021 values)15 |
| Angina 1st year | 3,559.20 | Tzanetakos et al 201414 (costs are inflation-adjusted to 2021 values)15 |
| Angina 2nd+ years | 1,179.17 | Tzanetakos et al 201414 (costs are inflation-adjusted to 2021 values)15 |
| Congestive heart failure 1st year | 3,851.77 | Tzanetakos et al 201414 (costs are inflation-adjusted to 2021 values)15 |
| Congestive heart failure 2nd plus years | 1,377.18 | Tzanetakos et al 201414 (costs are inflation-adjusted to 2021 values)15 |
| Stroke 1st year | 4,340.39 | Tzanetakos et al 201414 (costs are inflation-adjusted to 2021 values)15 |
| Stroke 2nd+ years | 1,946.57 | Tzanetakos et al 201414 (costs are inflation-adjusted to 2021 values)15 |
| Stroke death within 30 days | 3,620.27 | Tzanetakos et al 201414 (costs are inflation-adjusted to 2021 values)15 |
| Peripheral vascular disease 1st year | 5,627.92 | Tzanetakos et al 201414 (costs are inflation-adjusted to 2021 values)15 |
| Peripheral vascular disease 2nd+ years | 1,404.76 | Tzanetakos et al 201414 (costs are inflation-adjusted to 2021 values)15 |
|  |  |  |
| **Direct Costs Renal Complications** |  |  |
| Haemodialysis 1st year | 39,751.08 | Tzanetakos et al 201414 (costs are inflation-adjusted to 2021 values)15 |
| Haemodialysis 2+ years | 39,751.08 | Tzanetakos et al 201414 (costs are inflation-adjusted to 2021 values)15 |
| Peritoneal dialysis 1st year | 45,468.64 | Tzanetakos et al 201414 (costs are inflation-adjusted to 2021 values)15 |
| Peritoneal dialysis 2+ years | 43,005.87 | Tzanetakos et al 201414 (costs are inflation-adjusted to 2021 values)15 |
| Renal transplant costs 1st year | 18,213.66 | Tzanetakos et al 201414 (costs are inflation-adjusted to 2021 values)15 |
| Renal transplant 2+ years | 5,319.58 | Tzanetakos et al 201414 (costs are inflation-adjusted to 2021 values)15 |
|  |  |  |
| **Direct Costs Acute Events** |  |  |
| Non-severe hypoglycemic event | 0.00 | Tzanetakos et al 201616 (costs are inflation-adjusted to 2021 values)15 |
| Severe hypoglycemic event 1 (requiring non-medical assistance) | 689.58 | Tzanetakos et al 201414 (costs are inflation-adjusted to 2021 values)15 |
| Severe hypoglycemic event 2 (requiring medical assistance) | 689.58 | Tzanetakos et al 201414 (costs are inflation-adjusted to 2021 values)15 |
|  |  |  |
| **Direct Costs Eye Disease** |  |  |
| Laser treatment | 720.11 | Tzanetakos et al 201414 (costs are inflation-adjusted to 2021 values)15 |
| Cataract operation | 919.11 | Tzanetakos et al 201414 (costs are inflation-adjusted to 2021 values)15 |
| Following cataract operation | 58.12 | Tzanetakos et al 201414 (costs are inflation-adjusted to 2021 values)15 |
| Blindness - year of onset | 11,112.02 | Tzanetakos et al 201414 (costs are inflation-adjusted to 2021 values)15 |
| Blindness - following years | 6,107.67 | Tzanetakos et al 201414 (costs are inflation-adjusted to 2021 values)15 |
|  |  |  |
| **Direct Costs Neuropathy/Foot Ulcer/Amputation** | | |
| Neuropathy, 1st year | 1,103.32 | Tzanetakos et al 201414 (costs are inflation-adjusted to 2021 values)15 |
| Neuropathy, 2nd+ years | 1,103.32 | Tzanetakos et al 201414 (costs are inflation-adjusted to 2021 values)15 |
| Cost of Amputation (lower extremity) | 6,530.28 | Tzanetakos et al 201414 (costs are inflation-adjusted to 2021 values)15 |
| Cost of prosthesis following amputation | 1,132.87 | Tzanetakos et al 201414 (costs are inflation-adjusted to 2021 values)15 |
| Cost of amputation follow up | 1,132.87 | Tzanetakos et al 201414 (costs are inflation-adjusted to 2021 values)15 |
| Gangrene treatment | 5,203.34 | Tzanetakos et al 201414 (costs are inflation-adjusted to 2021 values)15 |
| After healed ulcer | 118.21 | Tzanetakos et al 201414 (costs are inflation-adjusted to 2021 values)15 |
| Infected ulcer | 2,792.78 | Tzanetakos et al 201414 (costs are inflation-adjusted to 2021 values)15 |
| Standard uninfected ulcer | 381.24 | Tzanetakos et al 201414 (costs are inflation-adjusted to 2021 values)15 |
| Healed ulcer history of amputation | 1,449.09 | Tzanetakos et al 201414 (costs are inflation-adjusted to 2021 values)15 |
| Cost of active ulcer | 1,449.09 | Tzanetakos et al 201414 (costs are inflation-adjusted to 2021 values)15 |

References

1 Häring HU, Merker L, Seewaldt-Becker E, Weimer M, Meinicke T, Broedl UC, Woerle HJ. EMPA-REG MET Trial Investigators. Empagliflozin as add-on to metformin in patients with type 2 diabetes: a 24-week, randomized, double-blind, placebo-controlled trial. Diabetes Care. 2014 Jun;37(6):1650-9. doi: 10.2337/dc13-2105.

2 Boehringer Ingelheim. Clinical Trial Report (Final report): A phase III randomised, double-blind, active-controlled parallel group efficacy and safety study of BI 10773 compared to glimepiride administered orally during 104 weeks with a 104-week extension period in patients with type 2 diabetes mellitus and insufficient glycaemic control despite metformin treatment. (2016).

3 Hayes, A.J., Leal, J., Gray, A.M., Holman, R.R. & Clarke, P.M. UKPDS outcomes model 2: a new version of a model to simulate lifetime health outcomes of patients with type 2 diabetes mellitus using data from the 30 year United Kingdom Prospective Diabetes Study: UKPDS 82. Diabetologia 56, 1925-1933 (2013).

4 Folsom, A.R., et al. Prediction of coronary heart disease in middle-aged adults with diabetes. Diabetes Care 26, 2777-2784 (2003).

5 Davis WA, Knuiman MW, Davis TM. An Australian cardiovascular risk equation for type 2 diabetes: the Fremantle Diabetes Study. Intern Med J. 2010 Apr;40(4):286-92. doi: 10.1111/j.1445-5994.2009.01958.x

6 World Health Organization. The tobacco atlas (ed. Mackay, J.E., M.) (2002).

7 World Health Organization. Global status report on alcohol and health (ed. Poznyak, V.R., D. ) (2018).

8 Group, A.C., et al. Intensive blood glucose control and vascular outcomes in patients with type 2 diabetes. N Engl J Med 358, 2560-2572 (2008).

9 Ismail-Beigi, F., et al. Effect of intensive treatment of hyperglycaemia on microvascular outcomes in type 2 diabetes: an analysis of the ACCORD randomised trial. Lancet 376, 419-430 (2010).

10 Zinman B, Wanner C, Lachin JM, Fitchett D, Bluhmki E, Hantel S, Mattheus M, Devins T, Johansen OE, Woerle HJ, Broedl UC, Inzucchi SE; EMPA-REG OUTCOME Investigators. Empagliflozin, Cardiovascular Outcomes, and Mortality in Type 2 Diabetes. N Engl J Med. 2015 Nov 26;373(22):2117-2128

11 Beaudet, A., Clegg, J., Thuresson, P.O., Lloyd, A. & McEwan, P. Review of utility values for economic modeling in type 2 diabetes. Value Health 17, 462-470 (2014).

12 Lauridsen, J.T., Lonborg, J., Gundgaard, J. & Jensen, H.H. Diminishing marginal disutility of hypoglycaemic events: results from a time trade-off survey in five countries. Qual Life Res 23, 2645-2650 (2014).

13 Foos, V.M., P. . Conversion of Hypoglycaemia Utility Decrements from Categorical Units Reflecting Event History into Event Specific Disutility Scores Applicable to Diabetes Decision Models. Value Health 21(2018).

14 Tzanetakos C, Melidonis A, Verras C, Kourlaba G, Maniadakis N. Cost-effectiveness analysis of liraglutide versus sitagliptin or exenatide in patients with inadequately controlled Type 2 diabetes on oral antidiabetic drugs in Greece. BMC Health Serv Res. 2014 Sep 22;14:419. doi: 10.1186/1472-6963-14-419.

15 Hellenic Statistical Authority. Inflation rates. Accessed December 09, 2021 [<https://www.statistics.gr/en/home/>]

16 Tzanetakos C, Tentolouris N, Kourlaba G, Maniadakis N. Cost-Effectiveness of Dapagliflozin as Add-On to Metformin for the Treatment of Type 2 Diabetes Mellitus in Greece. Clin Drug Investig. 2016 Aug;36(8):649-59. doi: 10.1007/s40261-016-0410-2.
